# Supplementary material for: Dry heated sorghum BRS 305 hybrid flour as a source of resistant starch and tannins improves inflammation and oxidative stress in Wistar rats fed with a high-fat high-fructose diet
Source: Royal Society of Chemistry journal article supplement (doi:10.1039/d1fo00802a), 2021-01-01
Supplement: d1fo00802a1.pdf [file d1fo00802a1.pdf]

Supplementary material

Table S1. Estimated free energy binding (EFE) and chemical interactions among the phenolic compounds present in sorghum flour.

| Compound              | AKT  |                                                                                                                                                                        | p65-NFκB    |                                                                                                                                                                                     |
|-----------------------|------|------------------------------------------------------------------------------------------------------------------------------------------------------------------------|-------------|-------------------------------------------------------------------------------------------------------------------------------------------------------------------------------------|
|                       | EFE  | Interacting amino acid residues                                                                                                                                        | EFE         | Interacting amino acid residues                                                                                                                                                     |
| <b>Catechin</b>       | -6.2 | LYS A: 419; LYS A: 289; LEU A: 210; GLUA: 228; SER A: 205; HIS A: 207; LEU A: 2013; ALA A: 476; ALA A: 212; LYS A: 214; ARG 2: 206; PRO A: 208                         | -7.2        | GLU C: 211; CYS D: 240; PHE C: 213; ASP C: 243; VAL C: 251; ALA C: 242; ARG D: 275; HIS C: 245; ARG C: 246; GLY D: 273; TYR D: 272; MET D: 271; ARG D: 242; GLU D: 250              |
| <b>Procyanidin B1</b> | -7.5 | SER A: 475; ASP A: 473; GLN A: 203; TYR A: 472; SER A: 477; ALA A: 476; ARG A: 206; SER A: 478; ASN A: 199; LEU A: 196; PRO A: 470; PHE A: 472; ARG A: 200; GLN A: 471 | <b>-8.9</b> | GLY D: 274; GLY D: 273; MET D: 271; THR D: 239; CYS D: 240; TYR D: 272; HIS C: 245; ARG C: 246; VAL C: 244; GLN C: 247; LYS C: 221; THR D: 276; ARG D: 275; PRO D: 301; GLY D: 279; |

|                                   |      |                                                                                                                                                                     |             |                                                                                                                                                                                                                                                      |
|-----------------------------------|------|---------------------------------------------------------------------------------------------------------------------------------------------------------------------|-------------|------------------------------------------------------------------------------------------------------------------------------------------------------------------------------------------------------------------------------------------------------|
|                                   |      |                                                                                                                                                                     |             | LEU D: 282; LEU D:<br>283; ASP D: 303; GLY<br>D: 304; GLU D: 302                                                                                                                                                                                     |
| <b>Procyanidin B2</b>             | -7.2 | ARG A: 174; LYS A:<br>214; TYR A: 175; TYR<br>A: 176; LEU A: 213;<br>TYR A: 229; ARG A:<br>206; ALA A: 476; SER<br>A: 205; HIS A: 207;<br>ALA A: 212; GLU A:<br>228 | <b>-8.9</b> | LYS C: 221; GLN C:<br>247; VAL C: 244; ARG<br>C: 246; GLY D: 273;<br>HIS C: 245; CYS D:<br>240; TYR D: 272; GLY<br>D: 279; LEU D: 282;<br>THR D: 276; PRO D:<br>301; ASP D: 303; LEU<br>D: 283; GLU D: 302;<br>ARG D: 275; GLY D:<br>304; GLY D: 274 |
| <b>Quercetin</b>                  | -6.3 | ALA A: 212; LYS A:<br>214; ARG A: 206; ALA<br>A: 476; LEU A: 213;<br>SER A: 205; HIS A: 207;<br>GLU A: 228; LYS A:<br>289; PRO A: 208; LYS<br>A: 419                | <b>-7.5</b> | ASP C: 243; ALA C:<br>242; ARG D: 275; HIS<br>C: 245; ARG C: 246;<br>GLY C: 273; TYR D:<br>272; MET D: 271; CYS<br>D: 240; PHE C: 213;<br>VAL C: 251; GLU C:<br>211; ARG D: 242; GLU<br>D: 250                                                       |
| <b>Quercetin 3-<br/>glucoside</b> | -6.9 | LYS A: 214; TYR A:<br>176; ARG A: 174; SER                                                                                                                          | <b>-8</b>   | ARG 3: 246; VAL C:<br>244; ALA C: 242; LEU                                                                                                                                                                                                           |

|                     |             |                       |             |                      |
|---------------------|-------------|-----------------------|-------------|----------------------|
|                     |             | A: 205; HIS A: 207;   |             | C: 215; ALA C: 249;  |
|                     |             | LEU A: 210; ALA A:    |             | HIS C: 245; PHE C:   |
|                     |             | 212; PRO A: 208; LYS  |             | 213; VAL C: 251; CYS |
|                     |             | A: 289LYS A: 419; GLU |             | C: 240; THR D: 239;  |
|                     |             | A: 228; ARG A: 206;   |             | ARG D: 242; GLU C:   |
|                     |             | SER A: 477; ALA A:    |             | 211; GLU D: 250; ASP |
|                     |             | 476; SER A: 478       |             | C: 243; MET D: 271;  |
|                     |             |                       |             | GLY D: 273; TYR D:   |
|                     |             |                       |             | 272; ARG D: 275      |
| <b>Quercetin 3-</b> | <b>-8.0</b> | ARG A: 206; HIS A:    | <b>-7.9</b> | ALA C: 242; ASP C:   |
| <b>rutinoside</b>   |             | 207; ALA A: 212; LEU  |             | 243; MET D: 271; HIS |
|                     |             | A: 210; LYS A: 289;   |             | C: 245; CYS D: 240;  |
|                     |             | PRO A: 208; LYS A:    |             | VAL C: 244; GLN C:   |
|                     |             | 419; GLU A: 228; TYR  |             | 241; GLY D: 273; ARG |
|                     |             | A: 176; LYS A: 214;   |             | C: 246; LYS C: 221;  |
|                     |             | ALA A: 476; SER A:    |             | LEU D: 282; ARG D:   |
|                     |             | 477; ARG A: 174; SER  |             | 275; GLY D: 304; GLY |
|                     |             | A: 478                |             | D: 274; ASP D: 303;  |
|                     |             |                       |             | PRO D: 301; GLY D:   |
|                     |             |                       |             | 279; GLU D: 302; THR |
|                     |             |                       |             | D: 276               |

---

EFE: Estimated free energy. Docking calculations were carried out using AutoDock Vina.

Negative values mean spontaneous reaction. Bold values represent the strongest interactions.
